# Supplementary material
Source: PubMed Central journal article supplement (PMC3761944)
Supplement: NIHMS438187-supplement-Supplementary_data.pdf [file NIHMS438187-supplement-Supplementary_data.pdf]

## Supplementary figure legends

**Fig. S1.** Visual display of CanScript-bound proteins. Proteins captured by biotinylated wild-type or mutant CanScript  $\times 3$  probe from AsPc1 nuclear extracts were released by boiling in loading buffer. Proteins were separated by SDS-PAGE followed by silver stain. Although “specific” protein bands were present in the C5M6c (mutant DNA)-bound sample, some of which are marked by arrowheads, excision and analysis of these bands showed them to be non-relevant. WT, wild-type.

**Fig. S2.** Verification of hits identified by TFM. Five arbitrarily chosen hits from Table 2 were examined by immunoblot following DNA affinity-capture. The protocol was as described in Fig. 2.

**Fig. S3,** Dependence of CanScript activity on expression of interactome genes. The siRNA sequences from Fig. 5 were tested for their effects using the pGL3-Can3 reporter. *TEAD1* siRNA provided a positive control. The activity of the irrelevant *FANCD2 (Irr)* siRNA-transfected sample was defined as “1”. The average activity was obtained from triplicate wells in each experiment. RLA, relative luciferase activity, as defined in Methods, was the measure of activity. Two independent experiments performed on different days had high agreement; a representative experiment is presented.

**Fig. S4.** No effects of *NAB1* and *RFX1* siRNAs on *TEAD1* expression. siRNA treatments of (A) *NAB1* and (B) *RFX1* were examined for effects on *TEAD1* expression in HeLa cells. Each gene was tested with the same siRNA sets in Fig. 5. Irrelevant target *FANCD2 (Irr)* and *TEAD1* siRNA served as negative and positive controls, respectively. GAPDH was used as a comparison for sample loading.

**Figure S1**

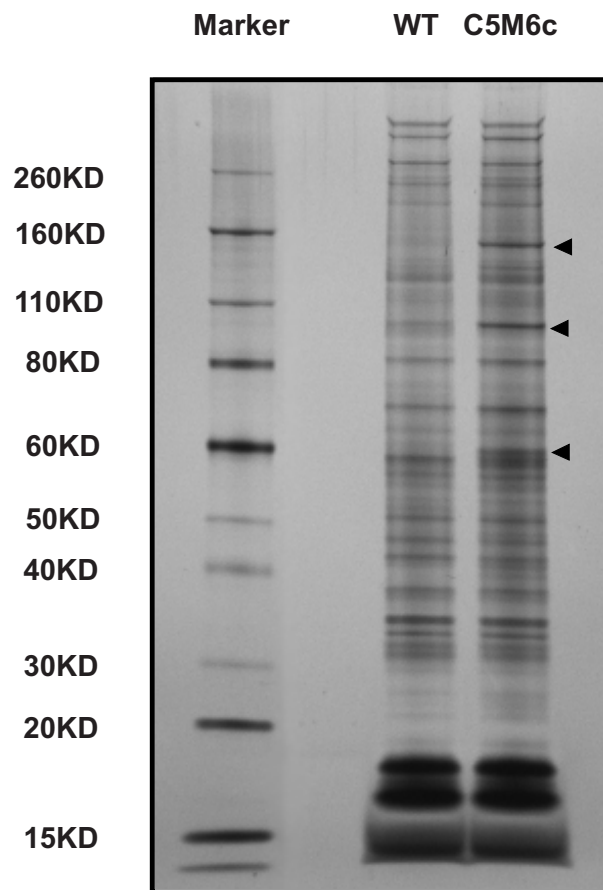

**Figure S2**

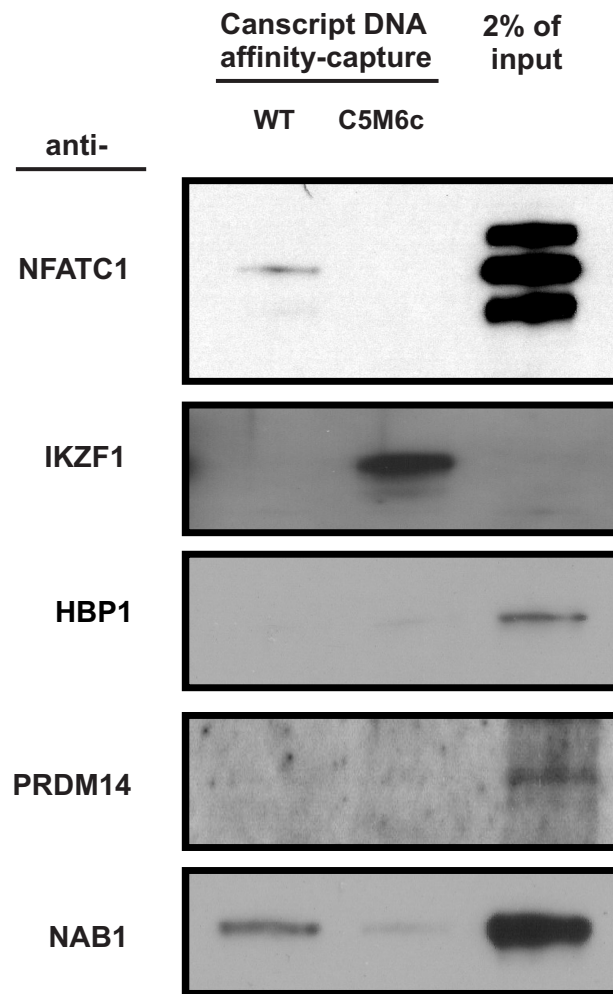

Figure S3

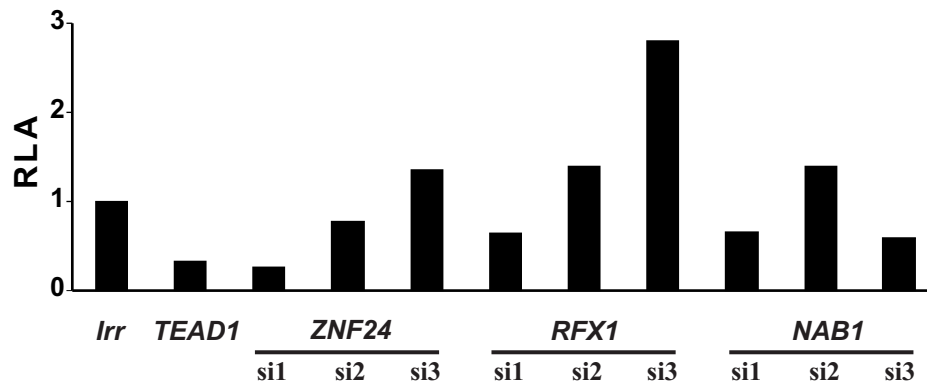

**Figure S4**

**A**

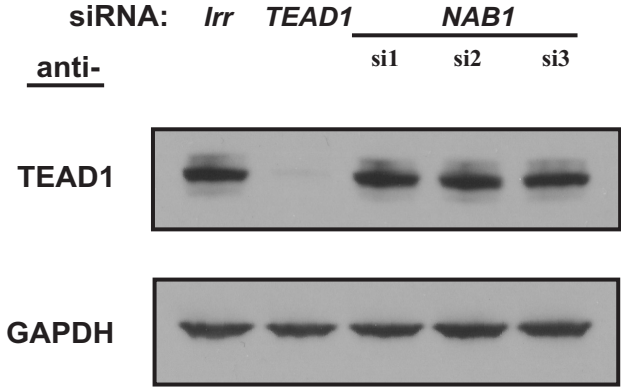

**B**

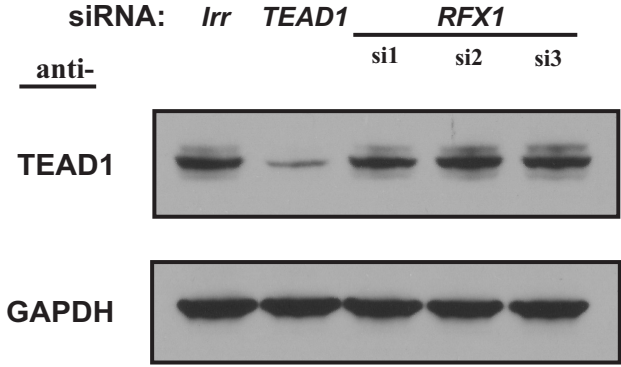

**Table S1****List of proteins binding Canscript sequence as identified by SD-MS\***

| Accession      | GeneSymbol          | ΣCoverage | Σ# Peptides | Σ# PSMs | Area     | Heavy/Light* | Identified protein full name                                            |
|----------------|---------------------|-----------|-------------|---------|----------|--------------|-------------------------------------------------------------------------|
| NP_003205.2    | TEAD3 <sup>§</sup>  | 29.43     | 10          | 24      | 1.43E+07 | 100          | transcriptional enhancer factor TEF-5                                   |
| NP_003204.2    | TEAD4 <sup>§</sup>  | 26.73     | 9           | 21      | 1.39E+07 | 100          | transcriptional enhancer factor TEF-3 isoform 1                         |
| NP_004354.2    | CEACAM5             | 3.13      | 2           | 4       | 1.58E+06 | 100          | carcinoembryonic antigen-related cell adhesion molecule 5 preproprotein |
| NP_005550.2    | LAMA1               | 0.42      | 1           | 1       | 5.60E+06 | 100          | laminin subunit alpha-1 precursor                                       |
| NP_068780.2    | TEAD1 <sup>§</sup>  | 33.8      | 12          | 47      | 2.79E+07 | 93.142       | transcriptional enhancer factor TEF-1                                   |
| NP_001078936.1 | CTNND1              | 1.8       | 1           | 1       | 5.18E+05 | 55.402       | catenin delta-1 isoform 3A                                              |
| NP_002909.4    | RFX1 <sup>§</sup>   | 2.45      | 2           | 8       | 1.12E+06 | 54.289       | MHC class II regulatory factor RFX1                                     |
| NP_001129493.1 | NFATC2 <sup>§</sup> | 4.66      | 3           | 5       | 7.55E+05 | 49.42        | nuclear factor of activated T-cells, cytoplasmic 2 isoform D            |
| NP_008896.2    | ZNF24 <sup>§</sup>  | 26.36     | 7           | 17      | 5.50E+06 | 40.886       | zinc finger protein 24                                                  |
| NP_005957.2    | NAB1 <sup>§</sup>   | 3.7       | 2           | 4       | 7.44E+05 | 40.246       | NGFI-A-binding protein 1                                                |
| NP_056276.1    | ZNF521 <sup>§</sup> | 0.92      | 1           | 2       | 2.40E+05 | 35.324       | zinc finger protein 521                                                 |
| NP_001035514.1 | PRDM15 <sup>§</sup> | 1.95      | 2           | 2       | 7.82E+05 | 28.537       | PR domain zinc finger protein 15 isoform 2                              |
| NP_001107019.1 | LIMA1               | 1.83      | 1           | 1       | 2.02E+05 | 26.581       | LIM domain and actin-binding protein 1 isoform c                        |
| NP_056009.1    | MYO1D               | 2.39      | 2           | 3       | 4.18E+05 | 23.695       | myosin-1d                                                               |
| NP_001091947.1 | GRSF1               | 10.38     | 2           | 3       | 2.69E+06 | 14.797       | G-rich sequence factor 1 isoform 2                                      |
| NP_060365.7    | DDX27               | 2.64      | 2           | 4       | 5.33E+05 | 8.429        | probable ATP-dependent RNA helicase DDX27                               |
| NP_000440.1    | RFX5                | 9.09      | 4           | 7       | 1.07E+06 | 8.319        | DNA-binding protein RFX5                                                |
| NP_001182461.1 | SPTAN1              | 5.02      | 11          | 15      | 1.43E+06 | 7.445        | spectrin alpha chain, brain isoform 3                                   |
| NP_002351.1    | MAFK                | 33.97     | 4           | 9       | 1.88E+06 | 6.522        | transcription factor MafK                                               |
| NP_003119.2    | SPTBN1              | 6.68      | 12          | 22      | 1.46E+06 | 5.774        | spectrin beta chain, brain 1 isoform 1                                  |
| NP_001091.1    | ACTA1               | 23.08     | 8           | 22      | 1.51E+07 | 5.254        | actin, alpha skeletal muscle                                            |
| NP_955458.1    | ZFP64               | 9.13      | 6           | 14      | 3.88E+06 | 4.893        | zinc finger protein 64 isoform c                                        |
| NP_116100.2    | MAFG                | 22.22     | 3           | 8       | 1.69E+06 | 4.607        | transcription factor MafG                                               |
| NP_002625.1    | PHB                 | 3.68      | 1           | 2       | 4.35E+05 | 4.295        | prohibitin                                                              |
| NP_002474.3    | CEACAM6             | 9.88      | 2           | 7       | 8.19E+06 | 4.257        | carcinoembryonic antigen-related cell adhesion molecule 6 precursor     |
| NP_003365.1    | VDAC1               | 3.89      | 1           | 1       | 1.29E+06 | 4.097        | voltage-dependent anion-selective channel protein 1                     |
| NP_036455.1    | MAFF                | 27.44     | 3           | 6       | 2.11E+06 | 4.086        | transcription factor MafF isoform a                                     |
| NP_203693.3    | MYO1C               | 1.56      | 1           | 1       | 6.87E+05 | 3.895        | myosin-1c isoform c                                                     |
| NP_002061.1    | GNAI2               | 7.32      | 2           | 5       | 5.36E+05 | 3.601        | guanine nucleotide-binding protein G(i) subunit alpha-2 isoform 1       |
| NP_001092.1    | ACTB                | 43.47     | 12          | 37      | 2.29E+07 | 3.47         | actin, cytoplasmic 1                                                    |
| NP_005002.3    | NRF1                | 1.59      | 1           | 1       | 7.90E+05 | 3.435        | nuclear respiratory factor 1                                            |
| NP_057615.3    | KLF3                | 24.93     | 5           | 10      | 8.38E+06 | 3.432        | Kruppel-like factor 3                                                   |
| NP_001077007.1 | POTEE               | 7.35      | 6           | 15      | 1.51E+07 | 3.126        | POTE ankyrin domain family member E                                     |
| NP_872589.1    | BAZ1A               | 2.76      | 3           | 4       | 6.67E+05 | 2.889        | bromodomain adjacent to zinc finger domain protein 1A isoform b         |
| NP_001120668.1 | CNBP                | 47.06     | 7           | 20      | 3.05E+06 | 2.748        | cellular nucleic acid-binding protein isoform 6                         |
| NP_000215.1    | KRT18               | 24.65     | 8           | 32      | 1.69E+07 | 2.745        | keratin, type I cytoskeletal 18                                         |
| NP_001017371.3 | SP3                 | 10.66     | 6           | 42      | 1.36E+07 | 2.692        | transcription factor Sp3 isoform 2                                      |
| NP_003357.2    | UQCRC2              | 8.61      | 2           | 4       | 6.83E+05 | 2.563        | cytochrome b-c1 complex subunit 2, mitochondrial precursor              |
| NP_068799.2    | ZNF148              | 6.05      | 4           | 11      | 9.99E+05 | 2.546        | zinc finger protein 148                                                 |
| NP_665906.1    | HMG1                | 25.23     | 3           | 14      | 9.55E+06 | 2.54         | high mobility group protein HMG-I/HMG-Y isoform a                       |
| NP_003371.2    | VIM                 | 7.08      | 3           | 5       | 5.85E+05 | 2.523        | vimentin                                                                |
| NP_001137307.1 | NFRKB               | 0.92      | 1           | 3       | 1.20E+06 | 2.428        | nuclear factor related to kappa-B-binding protein isoform 1             |
| NP_004740.2    | TBRG4               | 1.58      | 1           | 2       | 1.36E+05 | 2.153        | protein TBRG4 isoform 1                                                 |
| NP_006507.2    | SLC2A1              | 1.63      | 1           | 1       | 2.82E+05 | 2.119        | solute carrier family 2, facilitated glucose transporter member 1       |
| NP_002464.1    | MYH9                | 6.53      | 9           | 20      | 1.61E+06 | 2.066        | myosin-9                                                                |
| NP_066289.2    | UBC                 | 32.85     | 2           | 7       | 1.69E+06 | 2.057        | polyubiquitin-C                                                         |
| NP_005309.1    | H1FO                | 18.56     | 3           | 5       | 1.11E+06 | 2.054        | histone H1.0                                                            |
| NP_001128181.1 | DEK                 | 3.52      | 1           | 1       | 9.57E+05 | 2.036        | protein DEK isoform 2                                                   |
| NP_005313.1    | HIST1H1B            | 23.89     | 8           | 42      | 2.14E+07 | 2.027        | histone H1.5                                                            |

\* Protein candidates with WT/MT (heavy/light) ratio greater than 2.0 are listed.

§ Known transcription factors with WT/MT (heavy/light) ratio greater than 10

**Table S2****List of proteins binding Canscript sequence as identified by SD-MS\***

| Accession      | GeneSymbol          | ΣCoverage | Σ# Peptides | Σ# PSMs | Area     | Heavy/Light* | Identified protein full name                                       |
|----------------|---------------------|-----------|-------------|---------|----------|--------------|--------------------------------------------------------------------|
| NP_006734.1    | RBM3                | 55.41     | 5           | 17      | 1.37E+07 | 0.096        | putative RNA-binding protein 3                                     |
| NP_001271.1    | CIRBP               | 44.77     | 7           | 24      | 1.18E+07 | 0.089        | cold-inducible RNA-binding protein                                 |
| NP_005841.1    | SF3B4               | 17.45     | 4           | 10      | 3.70E+06 | 0.085        | splicing factor 3B subunit 4                                       |
| NP_002898.2    | RECQL               | 61.94     | 37          | 267     | 1.14E+08 | 0.08         | ATP-dependent DNA helicase Q1                                      |
| NP_001138898.1 | CSDA <sup>§</sup>   | 51.16     | 10          | 55      | 3.27E+07 | 0.075        | DNA-binding protein A isoform b                                    |
| NP_006187.2    | PCBP1               | 70.79     | 13          | 98      | 6.72E+07 | 0.071        | poly(rC)-binding protein 1                                         |
| NP_004550.2    | YBX1                | 54.32     | 15          | 82      | 9.96E+07 | 0.07         | nuclease-sensitive element-binding protein 1                       |
| NP_005692.1    | SNUPN               | 14.17     | 1           | 1       | 1.53E+06 | 0.068        | snurportin-1                                                       |
| NP_006833.2    | SF3B2               | 21.34     | 16          | 28      | 1.03E+07 | 0.067        | splicing factor 3B subunit 2                                       |
| NP_002902.2    | UPF1                | 9.93      | 9           | 14      | 2.56E+06 | 0.06         | regulator of nonsense transcripts 1                                |
| NP_001256.2    | CDX2 <sup>§</sup>   | 7.99      | 2           | 4       | 1.01E+06 | 0.052        | homeobox protein CDX-2                                             |
| NP_004490.2    | HNRNPAB             | 38.25     | 10          | 21      | 8.93E+06 | 0.05         | heterogeneous nuclear ribonucleoprotein A/B isoform b              |
| NP_068811.1    | RXRβ <sup>§</sup>   | 5.07      | 2           | 5       | 1.12E+06 | 0.048        | retinoic acid receptor RXR-beta                                    |
| NP_006749.1    | U2AF1               | 16.67     | 3           | 7       | 9.89E+05 | 0.042        | splicing factor U2AF 35 kDa subunit isoform a                      |
| NP_061824.3    | HOXA10 <sup>§</sup> | 5.85      | 2           | 2       | 8.47E+05 | 0.041        | homeobox protein Hox-A10 isoform a                                 |
| NP_001020402.1 | KPRP                | 1.55      | 1           | 2       | 2.36E+05 | 0.04         | keratinocyte proline-rich protein                                  |
| NP_002129.2    | HNRNPD              | 45.42     | 14          | 33      | 1.41E+07 | 0.038        | heterogeneous nuclear ribonucleoprotein D0 isoform c               |
| NP_001129248.1 | ZBTB43 <sup>§</sup> | 5.57      | 2           | 3       | 1.33E+06 | 0.027        | zinc finger and BTB domain-containing protein 43                   |
| NP_733829.1    | DAZAP1              | 4.23      | 1           | 2       | 3.28E+05 | 0.027        | DAZ-associated protein 1 isoform a                                 |
| NP_056290.3    | FAM98A              | 5.02      | 3           | 5       | 9.71E+05 | 0.027        | hypothetical protein LOC25940                                      |
| NP_004390.3    | DDX11               | 1.64      | 1           | 2       | 4.24E+05 | 0.025        | probable ATP-dependent RNA helicase DDX11 isoform 2                |
| NP_148934.1    | NRI12 <sup>§</sup>  | 3.02      | 1           | 1       | 4.31E+05 | 0.022        | nuclear receptor subfamily 1 group I member 2 isoform 3            |
| NP_002037.2    | GAPDH               | 7.16      | 1           | 1       | 8.78E+05 | 0.021        | glyceraldehyde-3-phosphate dehydrogenase                           |
| NP_001524.2    | HNRNPL              | 67.74     | 22          | 144     | 4.02E+07 | 0.019        | heterogeneous nuclear ribonucleoprotein L isoform a                |
| NP_006796.1    | HNRNPA0             | 29.84     | 7           | 16      | 1.60E+06 | 0.019        | heterogeneous nuclear ribonucleoprotein A0                         |
| NP_001140171.1 | RBM19               | 25.31     | 16          | 30      | 5.82E+06 | 0.018        | probable RNA-binding protein 19                                    |
| NP_003289.2    | NR2C2 <sup>§</sup>  | 3.74      | 2           | 3       | 6.20E+05 | 0.017        | nuclear receptor subfamily 2 group C member 2                      |
| NP_005546.2    | KRT6B               | 24.47     | 15          | 159     | 2.27E+08 | 0.017        | keratin, type II cytoskeletal 6B                                   |
| NP_002937.1    | RPA2                | 30        | 5           | 8       | 1.35E+06 | 0.015        | replication protein A 32 kDa subunit                               |
| NP_055323.2    | APOBEC3C            | 12.63     | 2           | 4       | 7.83E+05 | 0.014        | probable DNA dC-dU-editing enzyme APOBEC-3C                        |
| NP_114366.1    | PCBP2               | 67.4      | 13          | 96      | 9.75E+07 | 0.014        | poly(rC)-binding protein 2 isoform b                               |
| NP_001009931.1 | HRNR                | 15.44     | 11          | 46      | 4.82E+06 | 0.014        | hornerin                                                           |
| NP_071320.2    | TIA1                | 3.47      | 1           | 1       | 6.90E+05 | 0.014        | nucleolysin TIA-1 isoform p40 isoform 1                            |
| NP_055427.2    | FAM120A             | 5.37      | 4           | 6       | 1.37E+06 | 0.013        | constitutive coactivator of PPAR-gamma-like protein 1              |
| NP_005545.1    | KRT6A               | 24.29     | 15          | 128     | 2.12E+08 | 0.013        | keratin, type II cytoskeletal 6A                                   |
| NP_060101.3    | DDX60               | 0.76      | 1           | 1       | 7.04E+05 | 0.013        | probable ATP-dependent RNA helicase DDX60                          |
| NP_444513.1    | DCD                 | 10        | 1           | 2       | 8.74E+05 | 0.013        | dermcidin preproprotein                                            |
| NP_003015.2    | ITSN1               | 1.05      | 1           | 1       | 1.40E+06 | 0.012        | intersectin-1 isoform ITSN-I                                       |
| NP_067064.2    | WIZ                 | 5.29      | 3           | 5       | 1.87E+06 | 0.012        | protein Wiz                                                        |
| NP_000415.2    | KRT5                | 30        | 23          | 150     | 1.59E+08 | 0.011        | keratin, type II cytoskeletal 5                                    |
| NP_596869.4    | TTN                 | 0.04      | 1           | 2       | 6.78E+05 | 0.011        | titin isoform N2-A                                                 |
| NP_001007226.1 | IGF2BP2             | 10.07     | 4           | 17      | 8.08E+06 | 0.011        | insulin-like growth factor 2 mRNA-binding protein 2 isoform b      |
| NP_005548.2    | KRT16               | 31.08     | 15          | 138     | 8.98E+07 | 0.011        | keratin, type I cytoskeletal 16                                    |
| NP_149022.3    | KRT82               | 1.75      | 1           | 6       | 1.01E+08 | 0.011        | keratin, type II cuticular Hb2                                     |
| NP_002760.1    | PRSS1               | 4.05      | 1           | 1       | 8.18E+05 | 0.01         | trypsin-1 preproprotein                                            |
| NP_000468.1    | ALB                 | 2.46      | 1           | 21      | 4.51E+06 | 0.01         | serum albumin preproprotein                                        |
| NP_001014364.1 | FLG2                | 6.98      | 6           | 16      | 2.21E+06 | 0.01         | filaggrin-2                                                        |
| NP_976308.1    | ZNF784 <sup>§</sup> | 16.72     | 4           | 5       | 1.75E+06 | 0.01         | zinc finger protein 784                                            |
| NP_002193.2    | ISL1 <sup>§</sup>   | 6.59      | 2           | 2       | 1.15E+06 | 0.01         | insulin gene enhancer protein ISL-1                                |
| NP_000517.2    | KRT14               | 29.03     | 15          | 157     | 8.98E+07 | 0.01         | keratin, type I cytoskeletal 14                                    |
| NP_001122385.1 | PCBP2               | 78.51     | 13          | 93      | 9.75E+07 | 0.01         | poly(rC)-binding protein 2 isoform f                               |
| NP_000217.2    | KRT9                | 56.02     | 25          | 418     | 1.04E+08 | 0.01         | keratin, type I cytoskeletal 9                                     |
| NP_006112.3    | KRT1                | 65.84     | 39          | 743     | 3.26E+08 | 0.01         | keratin, type II cytoskeletal 1                                    |
| NP_001008844.1 | DSP                 | 1.63      | 4           | 5       | 1.50E+06 | 0.01         | desmoplakin isoform II                                             |
| NP_006538.2    | IGF2BP3             | 36.79     | 16          | 58      | 1.26E+07 | 0.01         | insulin-like growth factor 2 mRNA-binding protein 3                |
| NP_000412.3    | KRT10               | 62.84     | 34          | 780     | 3.66E+08 | 0.01         | keratin, type I cytoskeletal 10                                    |
| NP_000414.2    | KRT2                | 88.42     | 45          | 658     | 2.93E+08 | 0.01         | keratin, type II cytoskeletal 2 epidermal                          |
| NP_573566.2    | LRPPRC              | 75.68     | 93          | 476     | 1.50E+08 | 0.01         | leucine-rich PPR motif-containing protein, mitochondrial precursor |
| NP_004478.3    | GOLGB1              | 0.49      | 1           | 1       | 4.55E+06 | 0.01         | Golgin subfamily B member 1                                        |
| NP_775487.2    | KRT78               | 12.12     | 6           | 11      | 1.05E+07 | 0.01         | keratin, type II cytoskeletal 78                                   |
| NP_003642.3    | CSDA <sup>§</sup>   | 41.94     | 10          | 53      | 3.27E+07 | 0.01         | DNA-binding protein A isoform a                                    |
| NP_001167566.1 | ZEB1 <sup>§</sup>   | 6.24      | 5           | 10      | 1.41E+06 | 0.01         | zinc finger E-box-binding homeobox 1 isoform e                     |
| NP_114368.1    | PTBP1               | 72.88     | 23          | 195     | 1.53E+08 | 0.01         | polypyrimidine tract-binding protein 1 isoform c                   |
| NP_853515.2    | KRT27               | 5.88      | 3           | 67      | 1.08E+08 | 0.01         | keratin, type I cytoskeletal 27                                    |
| NP_004939.1    | DSC1                | 1.79      | 1           | 2       | 2.48E+06 | 0.01         | desmocollin-1 isoform Dsc1b preproprotein                          |
| NP_001136122.1 | HNRPLL              | 64.06     | 23          | 82      | 1.93E+07 | 0.01         | heterogeneous nuclear ribonucleoprotein L-like isoform 2           |
| NP_001157260.1 | ROD1                | 10.11     | 4           | 13      | 2.23E+07 | 0.01         | regulator of differentiation 1 isoform 2                           |
| NP_057726.3    | SPTBN5              | 0.44      | 1           | 1       | 1.54E+06 | 0.01         | spectrin beta chain, brain 4                                       |
| NP_002889.1    | RBMS2               | 6.14      | 2           | 5       | 1.44E+06 | 0.01         | RNA-binding motif, single-stranded-interacting protein 2           |

|                |                     |       |    |    |          |      |                                                                        |
|----------------|---------------------|-------|----|----|----------|------|------------------------------------------------------------------------|
| NP_112487.1    | SLIRP               | 60.55 | 7  | 23 | 1.22E+07 | 0.01 | SRA stem-loop-interacting RNA-binding protein, mitochondrial precursor |
| NP_001159506.1 | SBSN                | 17.63 | 3  | 10 | 1.03E+06 | 0.01 | suprabasin isoform 1 precursor                                         |
| NP_001933.2    | DSG1                | 3.05  | 2  | 3  | 4.46E+06 | 0.01 | desmoglein-1 preproprotein                                             |
| NP_689824.2    | LRRN4               | 2.7   | 1  | 6  | 1.54E+08 | 0.01 | leucine-rich repeat neuronal protein 4 precursor                       |
| NP_078843.2    | HMBOX1 <sup>§</sup> | 16.9  | 6  | 21 | 5.65E+06 | 0.01 | homeobox-containing protein 1                                          |
| NP_002888.1    | RBMS1               | 9.93  | 3  | 6  | 1.64E+06 | 0.01 | RNA-binding motif, single-stranded-interacting protein 1 isoform c     |
| NP_002936.1    | RPA1                | 36.53 | 15 | 38 | 5.44E+06 | 0.01 | replication protein A 70 kDa DNA-binding subunit                       |
| NP_002732.3    | PKN1                | 1.27  | 1  | 1  | 5.32E+06 | 0.01 | serine/threonine-protein kinase N1 isoform 2                           |
| NP_112583.2    | PMFBP1              | 0.6   | 1  | 2  | 3.14E+06 | 0.01 | polyamine-modulated factor 1-binding protein 1 isoform a               |
| NP_005800.3    | PRDX2               | 5.56  | 1  | 2  | 1.53E+06 | 0.01 | peroxiredoxin-2 isoform a                                              |
| NP_001036024.3 | EIF4G2              | 0.69  | 1  | 1  | 8.63E+05 | 0.01 | eukaryotic translation initiation factor 4 gamma 2 isoform 2           |
| NP_659489.1    | UPRT                | 2.27  | 1  | 4  | 5.65E+06 | 0.01 | uracil phosphoribosyltransferase homolog                               |
| NP_065850.1    | STAMBPL1            | 1.61  | 1  | 1  | 1.84E+06 | 0.01 | AMSH-like protease                                                     |
| NP_001157855.1 | STAU2               | 2.76  | 1  | 1  | 4.39E+06 | 0.01 | double-stranded RNA-binding protein Staufen homolog 2 isoform d        |

\* Protein candidates with WT/MT (heavy/light) ratio of less than 0.1 are listed.

§ Known transcription factors
